# Supplementary material for: Glycemic Index of Slowly Digestible Carbohydrate Alone and in Powdered Drink-Mix
Source: PubMed Central journal article supplement (PMC6627922; doi:10.3390/nu11061228), 2019-05-29
Supplement: nutrients-11-01228-s001.pdf [file nutrients-11-01228-s001.pdf]

**Glycemic Index of Slowly Digestible Carbohydrate Alone and in Powdered Drink-Mix**  
**Manuscript ID: nutrients-473016**

**Supplementary Table: Powdered Drink-mix Formulation**

| <b>Ingredients</b>               | <b>Control drink-mix (g)</b> | <b>SDC drink-mix (g)</b> |
|----------------------------------|------------------------------|--------------------------|
| Milk protein concentrate         | 4.13                         | 4.26                     |
| <b>Maltodextrin</b>              | <b>11.6</b>                  | <b>5.21</b>              |
| Buttermilk powder                | 3.21                         | 3.31                     |
| Sunflower oil powder             | 2.75                         | 2.84                     |
| <b>Sugar (white, granulated)</b> | <b>12.64</b>                 | <b>5.53</b>              |
| Soy Lecithin powder              | 0.46                         | 0.47                     |
| Flavor (Chocolate extract)       | 0.68                         | 0.71                     |
| Salt                             | 0.09                         | 0.09                     |
| Flavor (Vanillin)                | 0.09                         | 0.09                     |
| Cocoa powder                     | 8.27                         | 8.52                     |
| Gum/Hydrocolloid system          | 1.83                         | 1.89                     |
| Sweetener                        | 0.09                         | 0.09                     |
| <b>SUSTRA™ SDC</b>               | <b>0.0</b>                   | <b>14.31</b>             |

SDC: Slowly digestible carbohydrate
